# Supplementary material for: UNC13A in amyotrophic lateral sclerosis: from genetic association to therapeutic target
Source: PubMed Central journal article supplement — J Neurol Neurosurg Psychiatry. 2023 Feb 3;94(8):649–56. doi: 10.1136/jnnp-2022-330504 (PMC10359588; doi:10.1136/jnnp-2022-330504), 2023-02-03
Supplement: jnnp-2022-330504supp001.pdf [file jnnp-2022-330504supp001.pdf]

## Supplementary Figures and tables

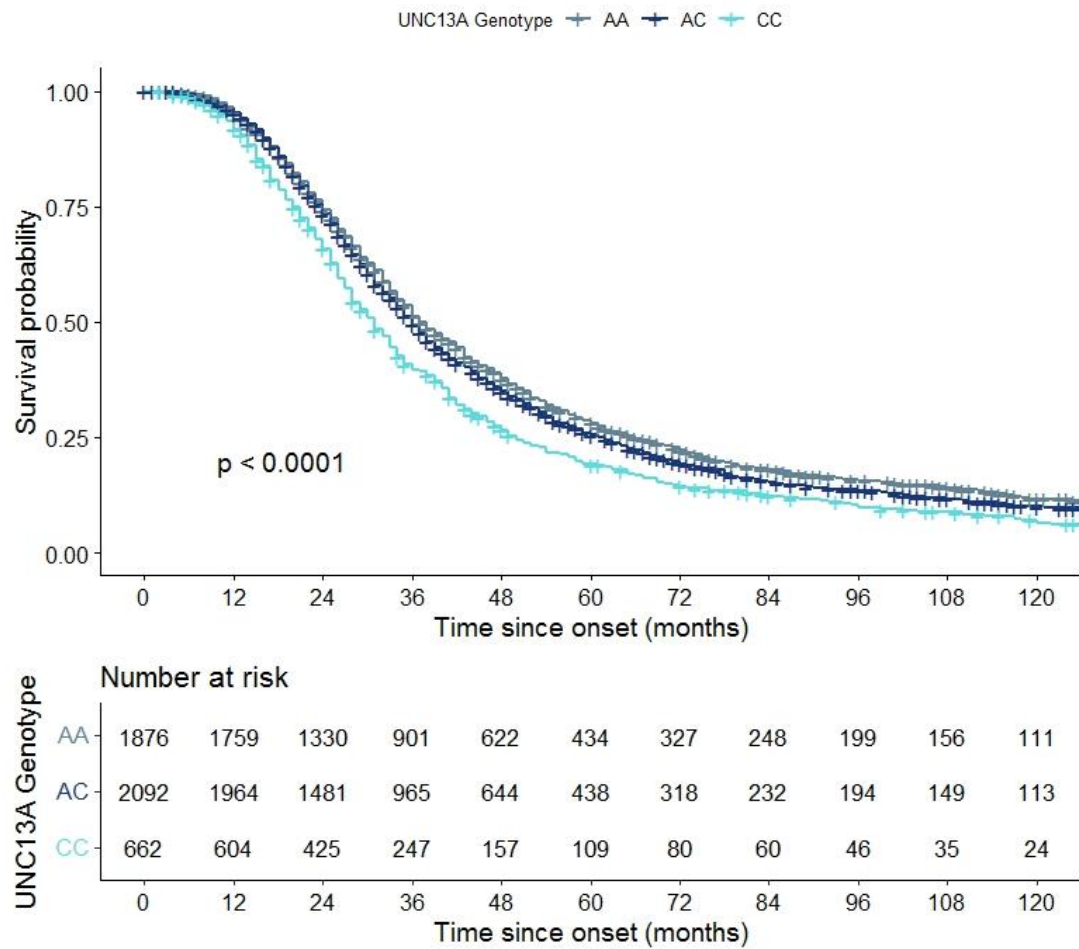**Supplementary figure 1: Overall survival for rs12608932 polymorphism under an additive model.**

The p-value indicates the difference in cumulative risk between homozygous C-allele carriers vs heterozygotes vs homozygous A-allele carriers.

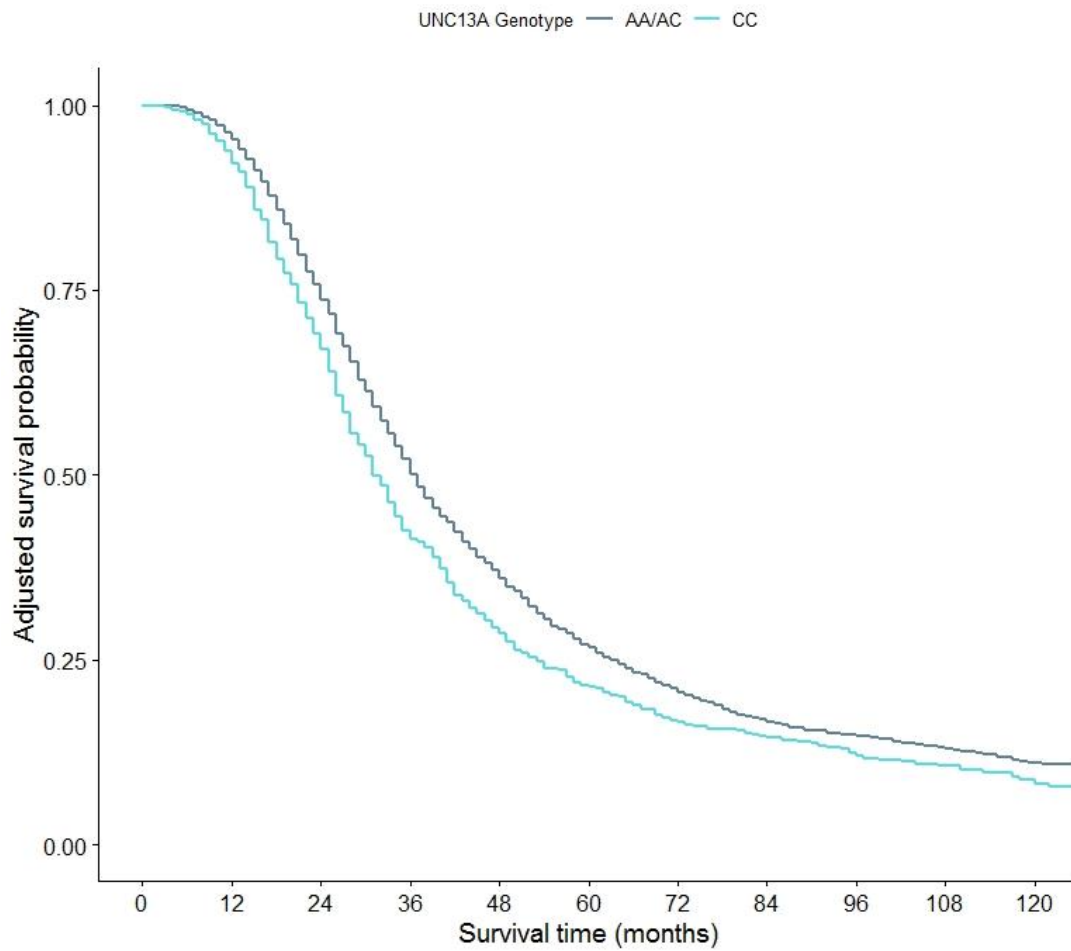

**Supplementary figure 2: Survival probability adjusted for sex, age at onset and site of onset for rs12608932 polymorphism under a recessive model.**

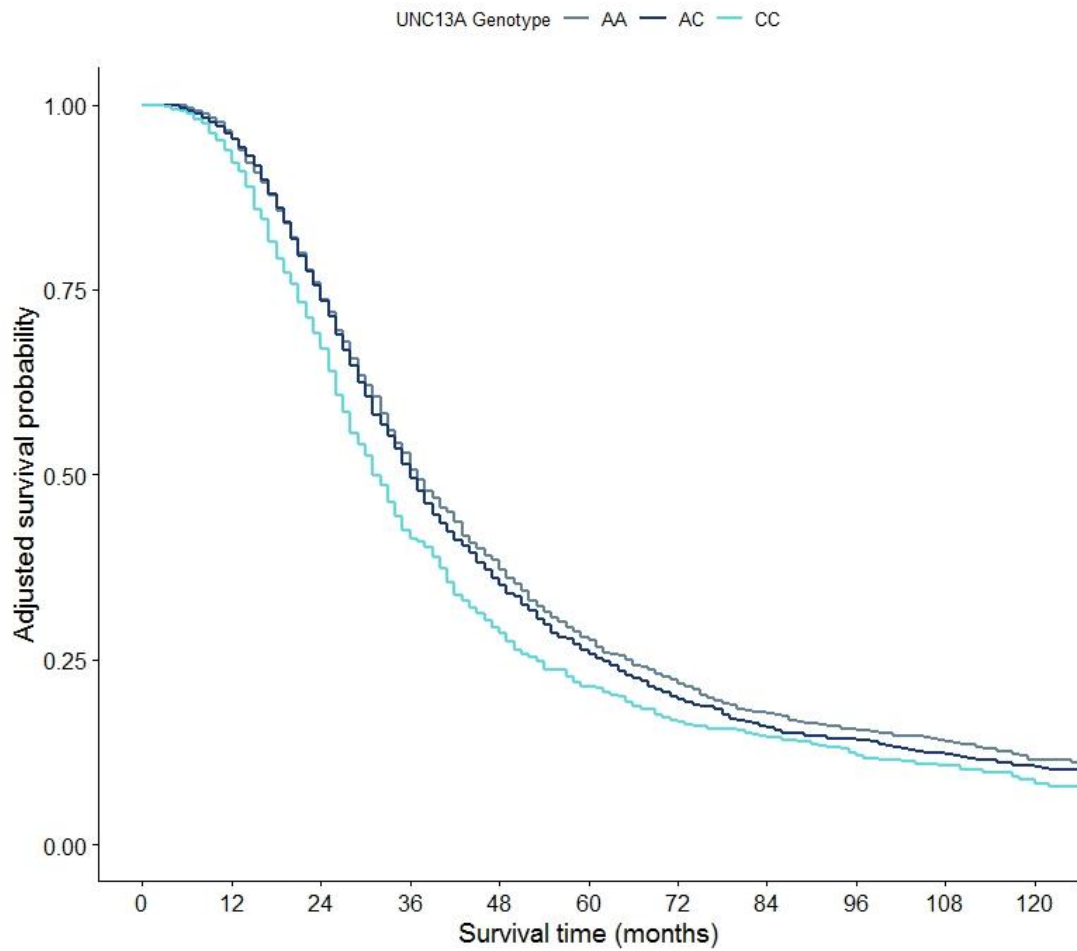

**Supplementary figure 3: Survival probability adjusted for sex, age at onset and site of onset for rs12608932 polymorphism under a recessive model.**
